# Supplementary material for: Facet-dependent photocatalytic performance and electronic structure of single-crystalline anatase TiO2 particles revealed by X-ray photoelectron spectromicroscopy
Source: Royal Society of Chemistry journal article supplement (doi:10.1039/d4tc03100h), 2024-11-14
Supplement: d4tc03100h1.pdf [file d4tc03100h1.pdf]

**Facet-dependent photocatalytic performance and electronic structure of single-crystalline anatase TiO<sub>2</sub> particle revealed by X-ray photoelectron spectromicroscopy**

Wenxiong Zhang,<sup>1\*</sup> Mustafa Al Samarai,<sup>1</sup> Haochong Zhao,<sup>1</sup> Daobin Liu,<sup>1</sup> Hisao Kiuchi,<sup>1</sup> Ralph Ugalino,<sup>1</sup> Sen Li,<sup>2</sup> Fangyi Yao,<sup>3</sup> Qi Feng,<sup>3</sup> Yoshihisa Harada<sup>1\*</sup>

<sup>1</sup>Institute for Solid State Physics, The University of Tokyo, 5-1-5 Kashiwanoha, Kashiwa, Chiba 277-8581, Japan.

<sup>2</sup>Department of Materials Science and Engineering, Southern University of Science and Technology, Shenzhen 518055 Guangdong, China.

<sup>3</sup>Department of Advanced Materials Science, Faculty of Engineering and Design, Kagawa University, 2217-20 Hayashi-Cho, Takamatsu-Shi 761-0396, Japan.

\*Corresponding authors

### Estimation of the valence band structure of the interface:

The interface areas for spots II and III were estimated to be approximately 88 nm and 93 nm, respectively. To achieve this, a constraint-based fitting model was employed, formulated as follows:

$$\text{II} - k_1 \text{I} \approx \text{III} - k_2 \text{IV}$$

Where I and IV represent the valence band (VB) spectra from the (101) and (001) facets of anatase TiO<sub>2</sub> single crystal, respectively. II and III correspond to the VB spectra from the regions between the (101) and (001) facets, adjacent to I and IV, respectively. The coefficients  $k_1$  and  $k_2$  serve as scaling factors that adjust the influence of the VB spectra I and IV on the interface VB spectra II and III, respectively. As a result, the coefficients were determined to be  $k_1 = 0.12$  and  $k_2 = 0.07$ . Utilizing these coefficients, the overall interface area was calculated as follows:

$$(1 - k_1) \times 100 \text{ nm} + (1 - k_2) \times 100 \text{ nm} = 88 \text{ nm} + 93 \text{ nm} = 181 \text{ nm}.$$

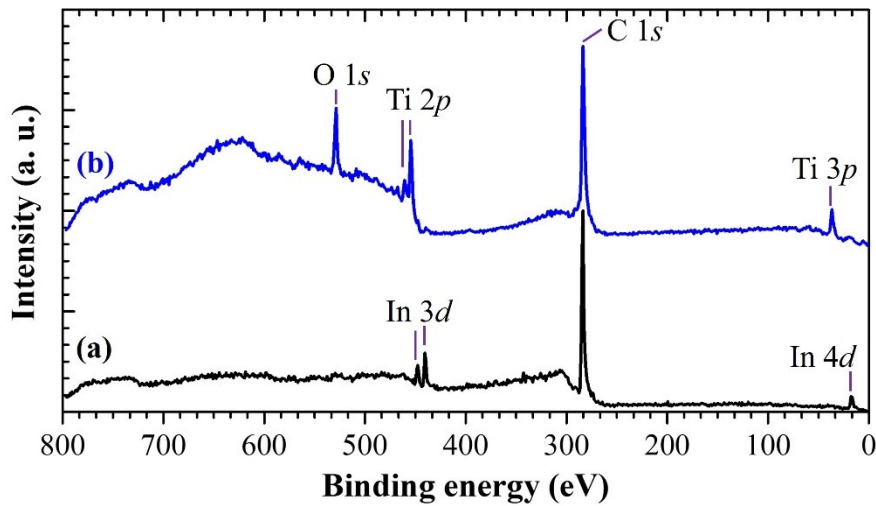

**Figure S1.** Wide XPS spectra of (a) indium sheet and (b) anatase powder samples held on indium sheet by direct beams without an X-ray condenser (1000 eV for incident X-ray energy).

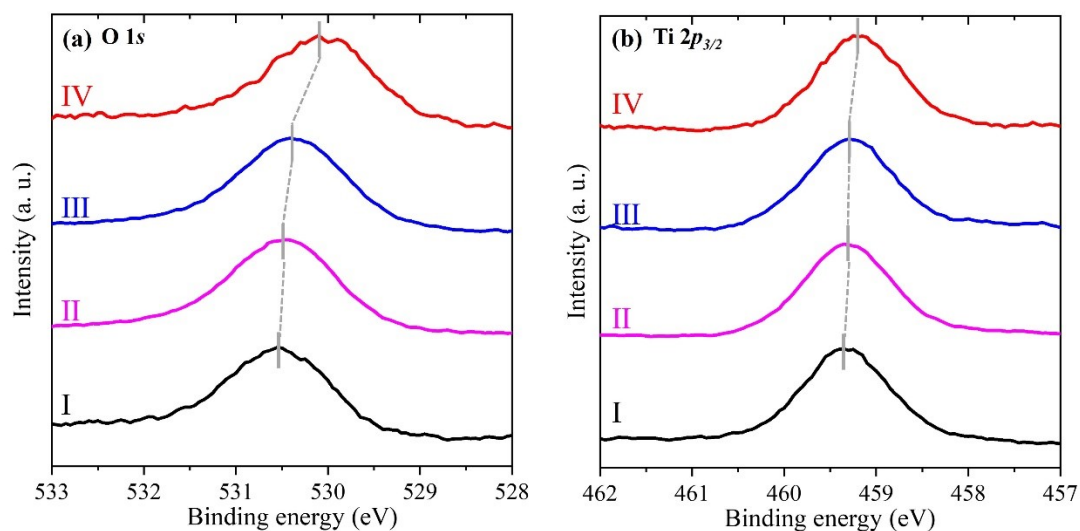

**Figure S2.** Localized amplification for pinpoint (a) O 1s and (b) Ti 2p XPS spectra of the single-crystalline anatase TiO<sub>2</sub> particle from consecutive 4 spots (I, II, III, and IV) shown in Fig. 2b.

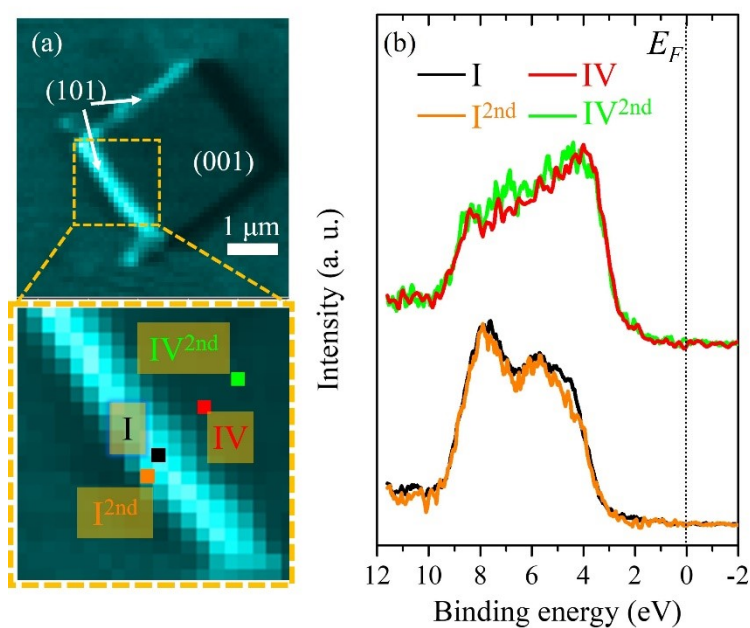

**Figure S3.** (a) O 1s photoelectron intensity mapping image and its enlarged area of the orange square of anatase TiO<sub>2</sub> single-crystalline particle and (b) Valence band XPS spectra of anatase TiO<sub>2</sub> particle for 2 spots from (101) (I and I<sup>2nd</sup>) and (001) (IV and IV<sup>2nd</sup>) facets shown in Fig. S3a, respectively.

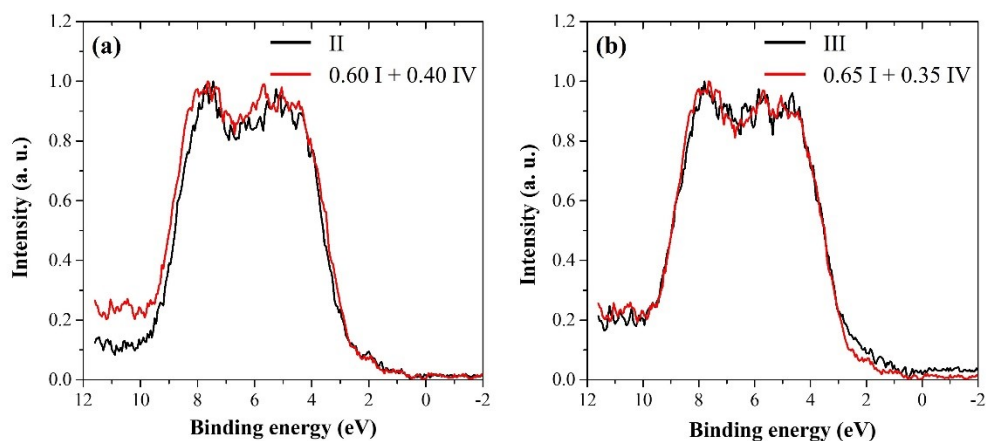

**Figure S4.** Reproducibility of the VB spectra at positions II (a) and III (b) by the sum of the VB spectra at positions I and IV shown in Fig. 3S. The ratios obtained here are based on the simulation of their peak intensities.

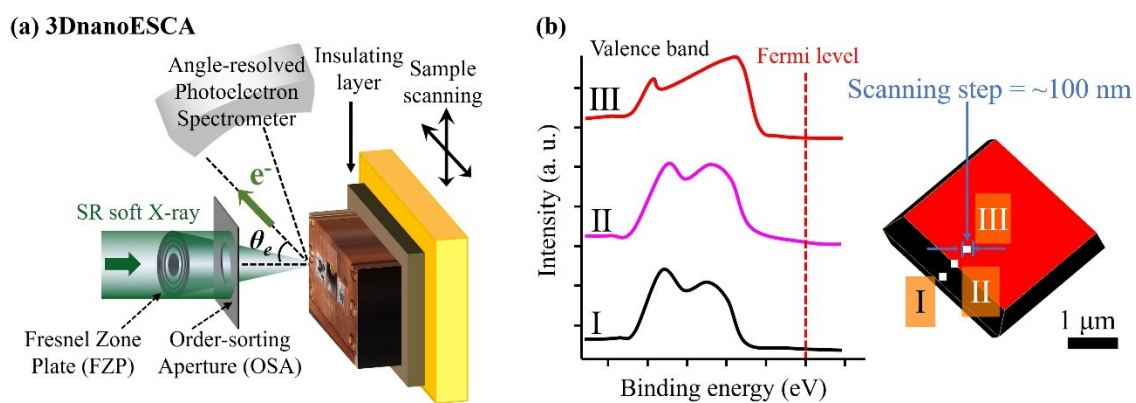

**Figure S5.** Schematic images for (a) 3DnanoESCA system and (b) facet-dependent valence band analysis of particle by microscopic XPS using 3DnanoESCA.
